# Supplementary material for: Acceptance and Willingness to Pay for Vaccine Against Human Papilloma Virus (HPV) Among Parents of Boys in Central Vietnam
Source: PubMed Central journal article supplement (PMC8960026; doi:10.3389/fpubh.2022.801984), 2022-03-10
Supplement: Table_1.pdf [file Table_1.pdf]

**Table 1.** Results of multivariate logistic regression model identified factors related to acceptability of parents for HPV vaccination for their son

| <b>Factors</b>                                      |                            | <b>OR</b> | <b>95% CI</b> | <b>p- value</b> |
|-----------------------------------------------------|----------------------------|-----------|---------------|-----------------|
| Age of son                                          | ≤ 12                       | 1         |               |                 |
|                                                     | > 12                       | 1.46      | 1.08 – 1.98   | 0.014           |
| The eldest son                                      | No                         | 1         |               |                 |
|                                                     | Yes                        | 1.57      | 1.13 – 2.19   | 0.007           |
| Defect/chronic disease of son                       | Yes                        | 1         |               |                 |
|                                                     | No                         | 0.82      | 0.33 – 2.01   | 0.664           |
| Relations with son                                  | Father                     | 1         |               |                 |
|                                                     | Mother                     | 1.38      | 1.01 – 1.92   | 0.045           |
| Age of parents                                      | > 40 years old             | 1         |               |                 |
|                                                     | ≤ 40 years old             | 1.03      | 0.73 – 1.45   | 0.863           |
| Educational level                                   | Secondary school and below | 1         |               |                 |
|                                                     | High school                | 1.35      | 0.89 – 2.03   | 0.150           |
|                                                     | University and higher      | 1.65      | 1.11 – 2.46   | 0.014           |
| Residence                                           | Hue city                   | 1         |               |                 |
|                                                     | Other                      | 0.26      | 0.06 – 1.11   | 0.069           |
| Marital status                                      | Living with wife/husband   | 1         |               |                 |
|                                                     | Separation/divorce/widow   | 1.74      | 0.87 – 3.45   | 0.115           |
| Characteristics of occupation                       | No income                  | 1         |               |                 |
|                                                     | Stable income              | 1.78      | 0.67 – 4.69   | 0.245           |
|                                                     | Unstable income            | 1.46      | 0.57 – 3.72   | 0.434           |
| Economic situation                                  | Poor/near poor             | 1         |               |                 |
|                                                     | Non poor/near poor         | 1.36      | 0.56 – 3.32   | 0.495           |
| Number of children                                  | ≥ 3                        | 1         |               |                 |
|                                                     | ≤ 2                        | 0.99      | 0.69 – 1.43   | 0.972           |
| Number of son                                       | ≥ 2                        | 1         |               |                 |
|                                                     | 1                          | 0.97      | 0.72 – 1.31   | 0.839           |
| Family history of HPV-related cancers               | Yes                        | 1         |               |                 |
|                                                     | No/don't remember          | 1.09      | 0.37 – 3.22   | 0.872           |
| Decision maker for health problem of their children | Both                       | 1         |               |                 |
|                                                     | Father                     | 1.38      | 0.80 – 2.39   | 0.245           |
|                                                     | Mother                     | 0.75      | 0.53 – 1.08   | 0.124           |
| Knowledge of HPV and HPV vaccine                    | Not good                   | 1         |               |                 |
|                                                     | Good                       | 1.81      | 1.22 – 2.67   | 0.003           |

**Table 2A.** Results of Spearman correlation to identify factors associated with WTP for HPV vaccine among participants

| Factors                       | WTP   |          |
|-------------------------------|-------|----------|
|                               | Rho   | p- value |
| Total mean score of knowledge | 0.11  | 0.028    |
| Parent's age                  | 0.05  | 0.288    |
| Son's age                     | -0.05 | 0.352    |
| Number of children            | -0.08 | 0.130    |
| Number of sons                | -0.06 | 0.240    |

**Table 2B.** Results of non-parametric tests to identify factors associated with WTP for HPV vaccine among participants (n=386)

| Factors                                       |                            | n   | Median (VND) | Range (VND) | p- value |
|-----------------------------------------------|----------------------------|-----|--------------|-------------|----------|
| Relation with male student                    | Mother                     | 244 | 2,980,000    | 3,980,000   | 0.159    |
|                                               | Father                     | 142 | 3,180,000    | 3,880,000   |          |
| Residence                                     | Hue city                   | 383 | 3,180,000    | 3,980,000   | 0.410    |
|                                               | Other                      | 3   | 3,580,000    | 600,000     |          |
| Educational level                             | Secondary school and below | 96  | 2,980,000    | 3,880,000   | 0.148    |
|                                               | High school                | 87  | 2,980,000    | 3,480,000   |          |
|                                               | University and higher      | 203 | 3,180,000    | 3,980,000   |          |
| Characteristics of occupation                 | No income                  | 8   | 2,980,000    | 3,780,000   | 0.455    |
|                                               | Stable income              | 195 | 3,180,000    | 3,980,000   |          |
|                                               | Unstable income            | 183 | 2,980,000    | 3,880,000   |          |
| Economic situation                            | Non poor/near poor         | 377 | 3,180,000    | 3,980,000   | 0.970    |
|                                               | Poor/near poor             | 9   | 3,180,000    | 600,000     |          |
| Marital status                                | Living with wife/husband   | 362 | 3,180,000    | 3,980,000   | 0.343    |
|                                               | Separation/divorce/widow   | 24  | 2,980,000    | 3,680,000   |          |
| Family history of HPV-related cancers         | Yes                        | 8   | 3,080,000    | 600,000     | 0.935    |
|                                               | No/don't remember          | 378 | 3,180,000    | 3,980,000   |          |
| Decision maker for health problem of children | Father                     | 35  | 3,380,000    | 3,680,000   | 0.530    |
|                                               | Mother                     | 90  | 2,980,000    | 3,980,000   |          |
|                                               | Both                       | 261 | 3,180,000    | 3,880,000   |          |
| The eldest son                                | No                         | 155 | 3,180,000    | 3,780,000   | 0.520    |
|                                               | Yes                        | 231 | 2,980,000    | 3,980,000   |          |
| Defect/chronic disease of son                 | No                         | 375 | 3,180,000    | 3,980,000   | 0.137    |
|                                               | Yes                        | 11  | 2,980,000    | 3,180,000   |          |

*Mann-Whitney U test was used to compare two groups*

*Kruskal- Wallis test was used to compare three groups*
